# Supplementary material for: Autism-associated Dyrk1a truncation mutants impair neuronal dendritic and spine growth and interfere with postnatal cortical development
Source: PubMed Central journal article supplement — Mol Psychiatry. 2017 Feb 7;23(3):747–58. doi: 10.1038/mp.2016.253 (PMC5822466; doi:10.1038/mp.2016.253), 2017-02-07

Supplementary Table 2 variants found in *DYRK1A* correspondence to *Dyrk1A*

| Exon | Nucleotide Change | AA code | Protein Change | Polyphen prediction | Domain                          |
|------|-------------------|---------|----------------|---------------------|---------------------------------|
| 3    | c.183G>C          | CAG>CAC | p.Q61H         | benign              |                                 |
| 5    | c.355C>T          | CAC>TAC | p.H119Y        | possibly damaging   |                                 |
| 5    | c.376G>T          | GAT>TAT | p.D126Y        | possibly damaging   | Biopartite nuclear localization |
| 5    | c.398G>A          | CGG>CAG | p.R133Q        | possibly damaging   | signal (117-134)                |
| 5    | c.468G>A          | ATG>ATA | p.M156I        | benign              |                                 |
| 6    | c.583G>A          | GCG>ACG | p.A195T        | possibly damaging   | protein kinase (159-479)        |
| 6    | c.613C>T          | CGG>TGA | p.R205X        |                     | protein kinase                  |
| 7    | c.715G>T          | GAA>TAA | p.E239X        |                     | protein kinase                  |
| 7    | c.777G>T          | TTG>TTT | p.L259F        | possibly damaging   | protein kinase                  |
| 10   | c.1373G>T         | AGG>ATG | p.R458M        | possibly damaging   | protein kinase                  |
| 10   | c.1457G>GA        | GGT>GAT | p.G486D        | possibly damaging   | protein kinase                  |

Supplementary Table 3 primers for mutagenesis analysis

| Primer No.     | the Specific Sequence         |
|----------------|-------------------------------|
| Dyrk1A_H119Y-F | TACCAACAGGGCCAGGGGGACGATT     |
| Dyrk1A_H119Y-R | TCTTCGCTTCTTTTTTGCATAGTAAACC  |
| Dyrk1A_D126Y-F | TATTCCAGTCATAAGAAGGAGCGGA     |
| Dyrk1A_D126Y-R | GTCCCCCTGGCCCTGTTGGTGTCTT     |
| Dyrk1A_R133Q-F | AGAAGGTTTACAATGATGGTTACGATG   |
| Dyrk1A_R133Q-R | GCTCCTTCTTATGACTGGAATCGTC     |
| Dyrk1A_A195T-F | ACGTTTCTGAATCAAGCCCAGATAG     |
| Dyrk1A_A195T-R | TTTCTTGTTCTTGATGATTTTAATGGCG  |
| Dyrk1A_R205X-F | TGGCTGCTTGAGCTCATGAACAAAC     |
| Dyrk1A_R205X-R | CACTTCTATCTGGGCTTGATTCAG      |
| Dyrk1A_E239X-F | TAAATGCTGTCCTATAATCTCTATG     |
| Dyrk1A_E239X-R | AAACTAAACAGAGATGGTTTCGAAAC    |
| Dyrk1A_L259F-F | TAACCTAACACGAAAGTTTGCGCAAC    |
| Dyrk1A_L259F-R | AAAGAGACCCCTCGGAAGTTGGTGTTC   |
| Dyrk1A_R458M-F | TGATGCTTGATTATGACCCCAAAC      |
| Dyrk1A_R458M-R | TTAAAATGAGGTCTTTGAACTTCAAGTAG |
| Dyrk1A_G486D-F | ATACCAACACAAGTAACAGTGTGTC     |
| Dyrk1A_G486D-R | CTTCATCAGCTGTTTTCTTGAAAAAAC   |

Supplementary figure 1. Dang et al.

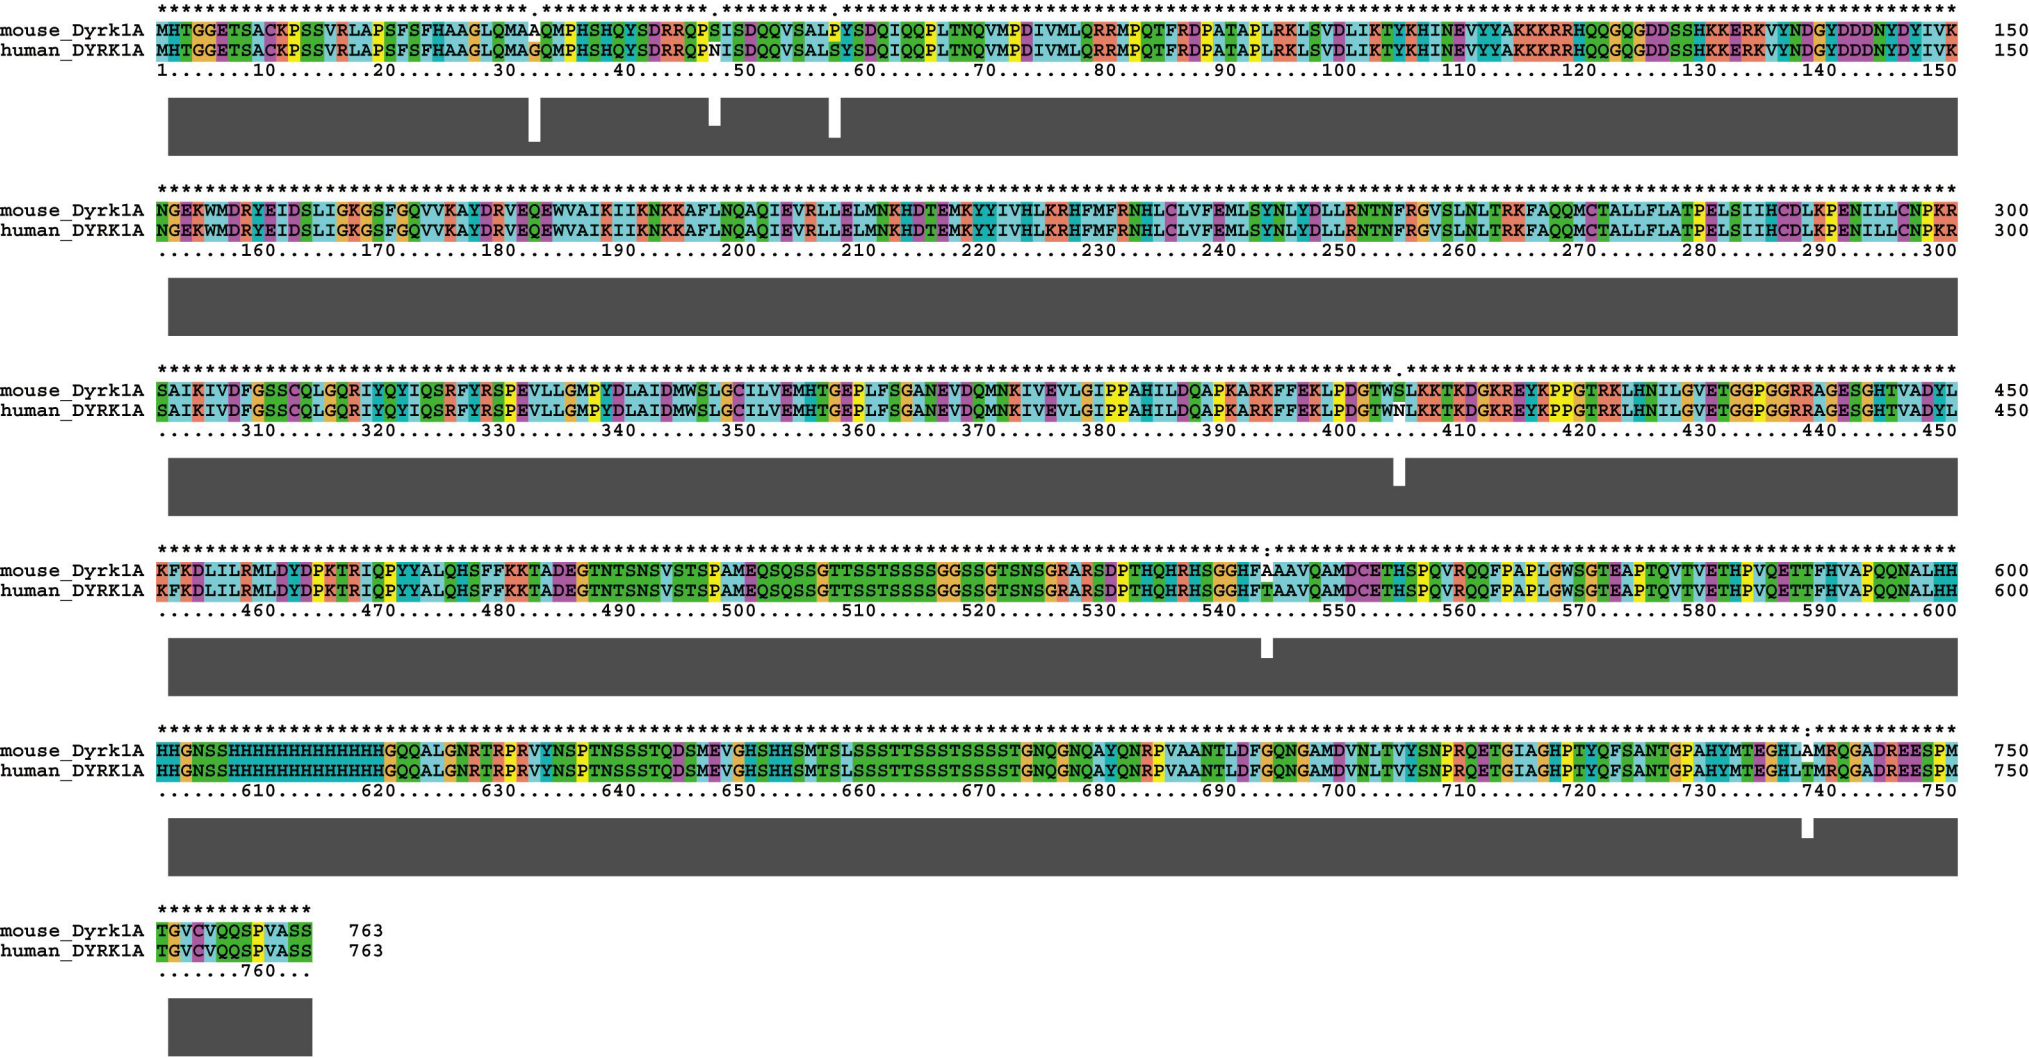

Supplement: mp2016253x1.pdf [file mp2016253x1.pdf]
